# Supplementary material
Source: PubMed Central journal article supplement (PMC6292767)
Supplement: NIHMS977477-supplement-1.pdf [file NIHMS977477-supplement-1.pdf]

**Supplemental Files**

**Perivascular signals alter global gene expression profile of glioblastoma and response to temozolomide in a gelatin hydrogel**

**Mai T. Ngo<sup>1</sup>, Brendan A.C. Harley<sup>2</sup>**

<sup>1</sup> Dept. Chemical and Biomolecular Engineering

<sup>2</sup> Carl R. Woese Institute for Genomic Biology  
University of Illinois at Urbana-Champaign  
Urbana, IL 61801

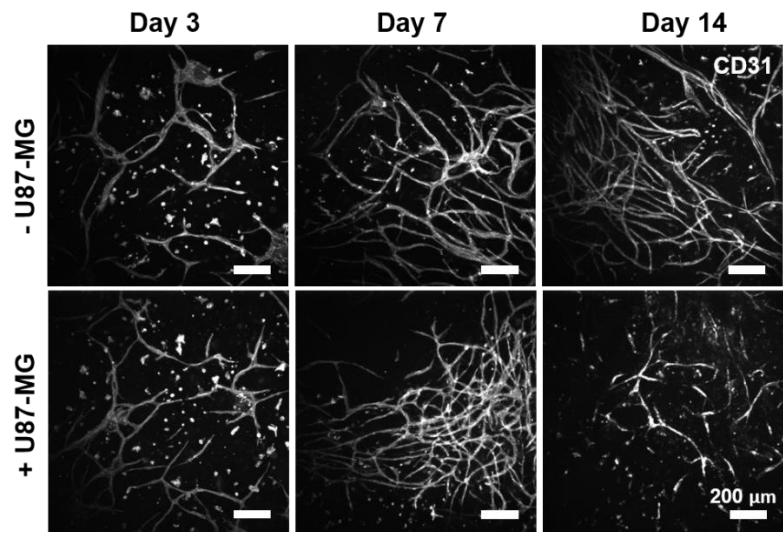

**Supplementary Figure 1.** Dissolution of endothelial networks in the presence of U87-MG tumor cells in GelMA + HAMA hydrogels.

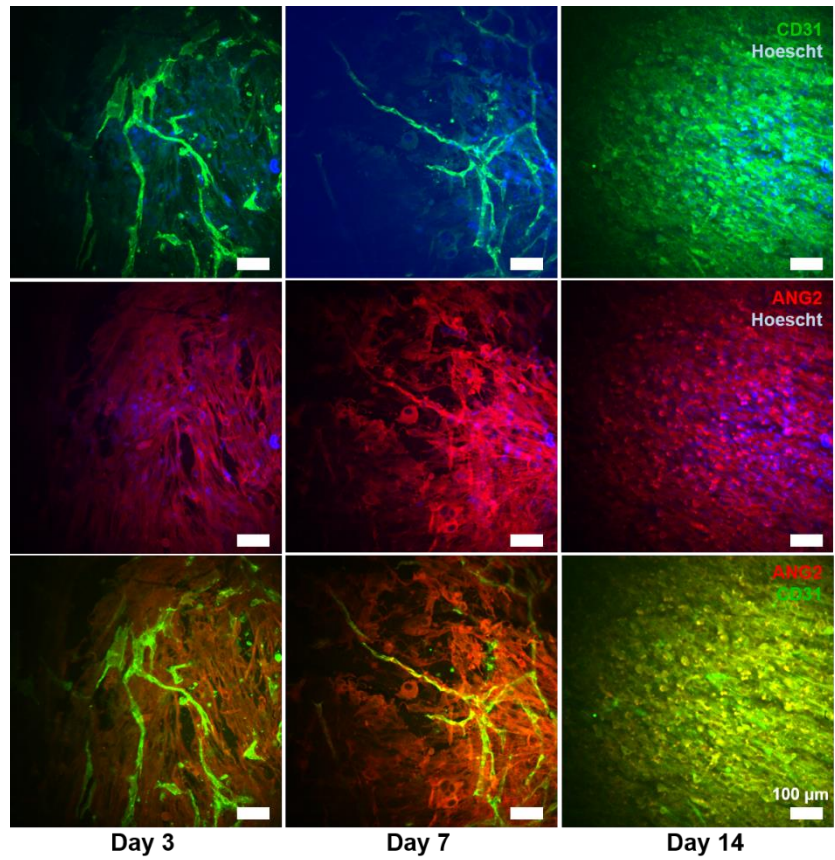

**Supplementary Figure 2.** Immunofluorescent staining for ANG2 and CD31 in *Tri-culture* hydrogels. Scale bar = 100 μm.

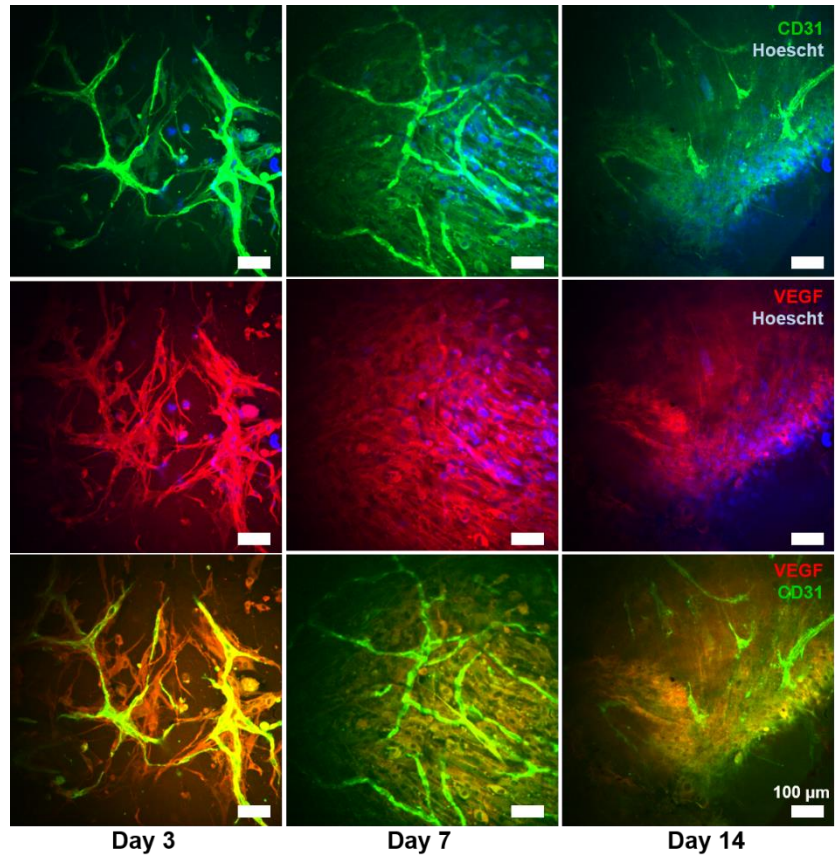

**Supplementary Figure 3.** Immunofluorescent staining for VEGF and CD31 in *Tri-culture* hydrogels. Scale bar = 100 µm.

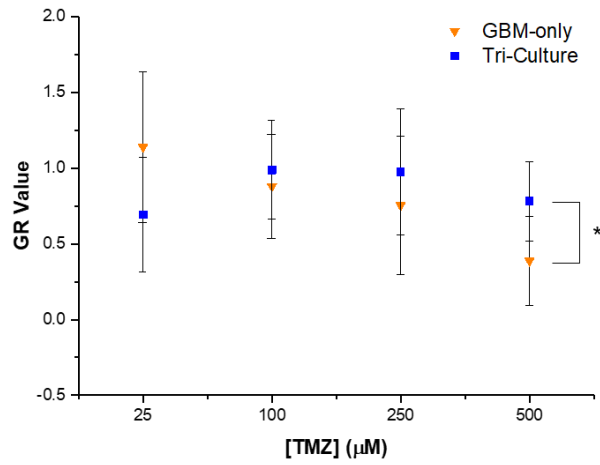

**Supplementary Figure 4.** Growth rate (GR) inhibition occurred in *GBM-only* GelMA-only hydrogels with increasing concentrations of TMZ, but was not observed in *Tri-Culture* GelMA-only hydrogels. \* $p < 0.05$  between groups. Data is presented as mean  $\pm$  SD. Two independent experiments were performed with three replicates each.

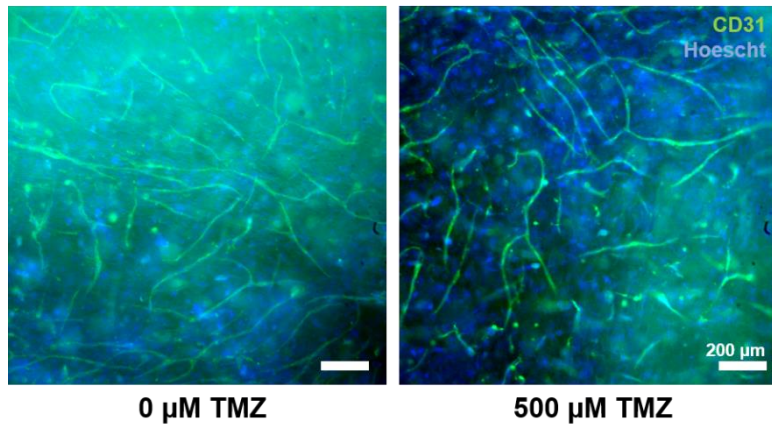

**Supplementary Figure 5.** Endothelial networks stained with CD31 after 48 hours with TMZ or control DMSO treatment. Scale bar = 200  $\mu\text{m}$ .
